# Supplementary material for: Short-acting β2-agonist prescriptions are associated with poor clinical outcomes of asthma: the multi-country, cross-sectional SABINA III study
Source: PubMed Central journal article supplement — Eur Respir J. 2022 May 5;59(5):2101402. doi: 10.1183/13993003.01402-2021 (PMC9068976; doi:10.1183/13993003.01402-2021), 2022-05-05

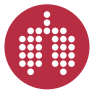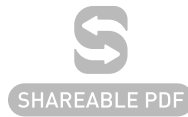

# Short-acting $\beta_2$ -agonist prescriptions are associated with poor clinical outcomes of asthma: the multi-country, cross-sectional SABINA III study

Eric D. Bateman <sup>1</sup>, David B. Price <sup>2,3</sup>, Hao-Chien Wang <sup>4</sup>, Adel Khattab <sup>5</sup>, Patricia Schonfeldt <sup>6</sup>, Angelina Catanzariti <sup>7</sup>, Ralf J.P. van der Valk <sup>8</sup> and Maarten J.H.I. Beekman <sup>9</sup>

<sup>1</sup>Division of Pulmonology, Dept of Medicine, University of Cape Town, Cape Town, South Africa. <sup>2</sup>Observational and Pragmatic Research Institute, Singapore. <sup>3</sup>Division of Applied Sciences, Centre of Academic Primary Care, University of Aberdeen, Aberdeen, UK. <sup>4</sup>Dept of Internal Medicine, National Taiwan University Hospital, Taipei, Taiwan. <sup>5</sup>Chest Dept, Faculty of Medicine, Ain Shams University, Cairo, Egypt. <sup>6</sup>Especialista Medicina Interna y Enfermedades Respiratorias, Instituto Nacional del Tórax ITMS Telemedicina de Chile, Santiago, Chile. <sup>7</sup>AstraZeneca, Sydney, Australia. <sup>8</sup>AstraZeneca, Cambridge, UK. <sup>9</sup>AstraZeneca, The Hague, The Netherlands.

Corresponding author: Eric D. Bateman ([Eric.Bateman@uct.ac.za](mailto:Eric.Bateman@uct.ac.za))

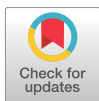

Shareable abstract (@ERSpublications)

Findings from SABINA III, which included 8351 patients from 24 countries, indicate that across treatment steps and clinical care settings, high SABA prescriptions were associated with higher rates of severe exacerbations and poorer asthma control <https://bit.ly/2VHBISg>

**Cite this article as:** Bateman ED, Price DB, Wang H-C, *et al.* Short-acting  $\beta_2$ -agonist prescriptions are associated with poor clinical outcomes of asthma: the multi-country, cross-sectional SABINA III study. *Eur Respir J* 2022; 59: 2101402 [DOI: 10.1183/13993003.01402-2021].

This single-page version can be shared freely online.

Copyright ©The authors 2022.

This version is distributed under the terms of the Creative Commons Attribution Non-Commercial Licence 4.0. For commercial reproduction rights and permissions contact [permissions@ersnet.org](mailto:permissions@ersnet.org)

Received: 18 May 2021  
Accepted: 7 Sept 2021

## Abstract

**Background** To gain a global perspective on short-acting  $\beta_2$ -agonist (SABA) prescriptions and associated asthma-related clinical outcomes in patients with asthma, we assessed primary health data across 24 countries in five continents.

**Methods** SABINA III was a cross-sectional study that employed electronic case report forms at a study visit (in primary or specialist care) to record prescribed medication(s), over-the-counter (OTC) SABA purchases and clinical outcomes in asthma patients ( $\geq 12$  years old) during the past 12 months. In patients with  $\geq 1$  SABA prescriptions, associations of SABA with asthma symptom control and severe exacerbations were analysed using multivariable regression models.

**Results** Of 8351 patients recruited (n=6872, specialists; n=1440, primary care), 76.5% had moderate-to-severe asthma and 45.4% experienced  $\geq 1$  severe exacerbations in the past 12 months. 38% of patients were prescribed  $\geq 3$  SABA canisters; 18.0% purchased OTC SABA, of whom 76.8% also received SABA prescriptions. Prescriptions of 3–5, 6–9, 10–12 and  $\geq 13$  SABA canisters (*versus* 1–2) were associated with increasingly lower odds of controlled or partly controlled asthma (adjusted OR 0.64 (95% CI 0.53–0.78), 0.49 (95% CI 0.39–0.61), 0.42 (95% CI 0.34–0.51) and 0.33 (95% CI 0.25–0.45), respectively; n=4597) and higher severe exacerbation rates (adjusted incidence rate ratio 1.40 (95% CI 1.24–1.58), 1.52 (95% CI 1.33–1.74), 1.78 (95% CI 1.57–2.02) and 1.92 (95% CI 1.61–2.29), respectively; n=4612).

**Conclusions** This study indicates an association between high SABA prescriptions and poor clinical outcomes across a broad range of countries, healthcare settings and asthma severities, providing support for initiatives to improve asthma morbidity by reducing SABA overreliance.

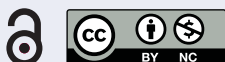

Supplement: ERJ-01402-2021.Shareable.pdf [file ERJ-01402-2021.Shareable.pdf]
